# Supplementary material for: Seismic Damage Behavior of Aeolian Sand Concrete Columns with an Inner Square Steel Tube
Source: Hindawi journal article supplement (doi:10.1155/2019/1306194), 2019-01-01
Supplement: f1 [file 1306194.f1.zip]

Archive with 4 entries (4 files):
- 1306194.f1/Coordinates  of secant stiffness_ACE_2924014.xlsx
- 1306194.f1/Coordinates of skeleton curve_ACE_2924015.xlsx
- 1306194.f1/Coordinatesof accumulative energy dissipation_ACE_2924016.xlsx
- 1306194.f1/mat.1306194.v3.docx
