# Supplementary material for: Seismic Damage Behavior of Aeolian Sand Concrete Columns with an Inner Square Steel Tube
Source: Hindawi journal article supplement (doi:10.1155/2019/1306194), 2019-01-01
Supplement: f1 [file 1306194.f1.zip › 1306194.f1/Coordinates of secant stiffness_ACE_2924014.xlsx]

## Sheet: Sheet1
PC1			SC1			SC2			SC3			TSC1			TSC2			TSC3
Drift ratio	secant stiffness		Drift ratio	secant stiffness		Drift ratio	secant stiffness		Drift ratio	secant stiffness		Drift ratio	secant stiffness		Drift ratio	secant stiffness		Drift ratio	secant stiffness
0.04247	0.06037		0.04366	0.06354		0.04503	0.06658		0.05697	0.04892		0.07505	0.06939		0.0784	0.06361		0.08072	0.05766
0.03185	0.09628		0.03274	0.0973		0.03377	0.10398		0.04558	0.07149		0.05901	0.11028		0.06451	0.0966		0.07093	0.08198
0.02123	0.15894		0.02183	0.15578		0.02251	0.15935		0.03418	0.10616		0.04427	0.14479		0.04733	0.12415		0.04647	0.12042
0.01062	0.27009		0.01091	0.28179		0.01126	0.28048		0.02279	0.16174		0.02897	0.20705		0.02589	0.2102		0.02373	0.2024
0.00664	0.35467		0.00593	0.38811		0.00522	0.43616		0.01139	0.29418		0.01425	0.34959		0.01361	0.33299		0.01332	0.3033
0.00444	0.42466		0.00398	0.46282		0.00356	0.51188		0.00458	0.49484		0.00953	0.41973		0.0092	0.39422		0.00899	0.35646
0.00271	0.52141		0.00228	0.60665		0.00219	0.62361		0.00321	0.56483		0.00593	0.50563		0.00572	0.46905		0.00555	0.43303
0.00141	0.6763		0.00133	0.7011		0.00123	0.74491		0.00204	0.66713		0.00327	0.61215		0.00305	0.59422		0.00292	0.54835
0.000471223	1		0.00046056	1		0.000454789	1		0.00119	0.7724		0.001	1		0.000906667	1		0.0008	1
									0.000453634	1
