# Supplementary material for: Seismic Damage Behavior of Aeolian Sand Concrete Columns with an Inner Square Steel Tube
Source: Hindawi journal article supplement (doi:10.1155/2019/1306194), 2019-01-01
Supplement: f1 [file 1306194.f1.zip › 1306194.f1/Coordinates of skeleton curve_ACE_2924015.xlsx]

## Sheet: Sheet1
PC1			SC1			SC2			SC3			TSC1			TSC2			TSC3
F(kN)	Δ(mm)		F(kN)	Δ(mm)		F(kN)	Δ(mm)		F(kN)	Δ(mm)		F(kN)	Δ(mm)		F(kN)	Δ(mm)		F(KN)	Δ(mm)
-54.4104	-37.16		-60.232	-38.2		-65.8974	-39.4		-61.4406	-49.85		-110.5	-56.24		-116.88	-58.7		123.45	61.24
-65.0762	-27.87		-69.1714	-28.65		-77.1866	-29.55		-71.8293	-39.88		-130.2	-44.21		-137.5	-48.28		145.7	53.35
-71.6199	-18.58		-73.8333	-19.1		-78.857	-19.7		-79.9906	-29.91		-128.15	-33.2		-132.5	-35.5		140	35
-60.8533	-9.29		-66.777	-9.55		-69.4	-9.85		-81.2517	-19.94		-120	-33.2		-120	-19.32		120	17.95
-50	-5.81265		-50	-5.19176		-50	-4.5636		-73.8914	-9.97		-100	-10.64		-100	-10.11		100	10.14
-40	-3.88373		-40	-3.48299		-40	-3.11078		-50	-4.01074		-80	-7.1		-80	-6.8		80	6.89
-30	-2.37234		-30	-1.9929		-30	-1.91508		-40	-2.811		-60	-4.4		-60	-4.19		60	4.31
-20	-1.23154		-20	-1.16112		-20	-1.07952		-30	-1.78498		-40	-2.4		-40	-2.19		40	2.34
-10	-0.41232		-10	-0.40299		-10	-0.39794		-20	-1.03807		-20	-0.7		-20	-0.58		20	0.75
0	0		0	0		0	0		-10	-0.39693		0	0		0	0		0	0
10	0.40905		10	0.40299		10	0.39794		0	0		20	0.8		20	0.78		-20	-0.45
20	1.22728		20	1.18241		20	1.1008		10	0.39693		40	2.5		40	2.39		-40	-2.04
30	2.40314		30	2.15729		30	1.94508		20	1.06934		60	4.5		60	4.39		-60	-4.01
40	3.88155		40	3.68299		40	3.38078		30	1.76498		80	7.2		80	7		-80	-6.59
50	5.85782		50	5.21762		50	4.5636		40	3.011		100	10.74		100	10.31		-100	-9.84
61.5649	9.29		65.777	9.55		70	9.85		50	4.01074		120	21.78		120	19.52		-120	-17.65
71.0515	18.58		74.8333	19.1		79.857	19.7		73.437	9.97		128.15	33.2		132.5	35.5		-140	-34.7
64.5597	27.87		70.9714	28.65		75.1866	29.55		82.2517	19.94		130.2	44.31		137.5	48.48		-145.7	-53.05
55.1589	37.16		60.932	38.2		66.9741	39.4		79.0906	29.91		110.5	56.34		116.88	58.9		-123.45	-59.84
									71.6293	39.88
									60.4406	49.85
