# Supplementary material for: Seismic Damage Behavior of Aeolian Sand Concrete Columns with an Inner Square Steel Tube
Source: Hindawi journal article supplement (doi:10.1155/2019/1306194), 2019-01-01
Supplement: f1 [file 1306194.f1.zip › 1306194.f1/Coordinatesof accumulative energy dissipation_ACE_2924016.xlsx]

## Sheet: Sheet1
PC1			SC1			SC2			SC3			TSC1			TSC2			TSC3
Δ(mm)	E(kN•mm)		Δ(mm)	E(kN•mm)		Δ(mm)	E(kN•mm)		Δ(mm)	E(kN•mm)		Δ(mm)	E(kN•mm)		Δ(mm)	E(kN•mm)		Δ(mm)	E(kN•mm)
0	0		0	0		0	0		0	0		0	0		0	0		0	0
0.405	4.81576		0.399	5.1734		0.394	5.5756		0.393	5.84074		0.8	5.04		0.78	16.3		0.75	13.11
1.02148	16.275		0.98785	20.4964		0.98785	18.6983		0.97774	21.2798		2.5	110.7		2.39	110.07		2.34	100.29
1.98251	52.0286		1.90884	66.4261		1.87817	58.898		1.83249	66.4509		4.5	313.82		4.39	322.45		4.31	332.35
3.46155	138.507		3.38299	158.271		3.28078	163.222		3.1414	175.093		7.2	774.02		7	747.245		6.89	864.717
5.31782	325.295		5.11762	352.447		4.83595	361.263		4.68395	378.465		10.74	1629.4		10.31	1473.79		10.14	1677.98
9.29	850.33		9.55	946.139		9.85	1056.07		9.97	1117.02		21.78	4315.96		19.52	3468.43		17.95	3605.3
18.58	2181.53		19.1	2443.62		19.7	2701.42		19.94	2911.29		33.2	7550.76		35.5	8263.65		35	8435.68
27.87	4341.01		28.65	4800.69		29.55	5273.14		29.91	5760.64		44.31	10059.9		48.48	12337.7		53.35	14567.5
37.16	7027.64		38.2	7830.93		39.4	8635.46		39.88	9528.25		56.34	13154.5		58.9	15892.9		61.24	16083.2
