# Supplementary material for: Seismic Damage Behavior of Aeolian Sand Concrete Columns with an Inner Square Steel Tube
Source: Hindawi journal article supplement (doi:10.1155/2019/1306194), 2019-01-01
Supplement: f1 [file 1306194.f1.zip › 1306194.f1/mat.1306194.v3.docx]

Dear reviewer:

Thank you for giving us valuable comments on the paper. Based on the comments, the authors agreed to share the results of the experiment. The detailed experimental data are listed as below.

**1 hysteresis curves**

The file named “Coordinates of hysteretic curve” which has been uploaded through the Manuscript Tracking System shows coordinate points of hysteretic curve corresponding to Fig. 7. In this file, “F” represents lateral load and “Δ” represents displacement. The detailed data is shown as below.

**2 skeleton curves**

The file named “Coordinates of skeleton curve” which has been uploaded through the Manuscript Tracking System shows the coordinate points of skeleton curves corresponding to Fig. 8. In this file, “F” represents lateral load and “Δ” represents displacement. The detailed data is shown as below.

**3 Accumulative energy dissipation**

The file named “Accumulative energy dissipation” which has been uploaded through the Manuscript Tracking System shows the coordinate points of cumulative energy consumption corresponding to Fig.10. In this file, “E” represents cumulative energy consumption and “Δ” represents displacement. The detailed data is shown as below.

**4 Stiffness degradation**

In this paper, secant stiffness is used to reflect the stiffness degradation of specimens. The secant stiffness is calculated as follows:

where + is the load value of the peak point in the positive direction and is the load value of the i-th peak point in the negative direction. is the displacement of the i-th peak point in the positive direction, and is the displacement of the i-th peak point in the negative direction. The file named “Secant stiffness” which has been uploaded through the Manuscript Tracking System shows the coordinate points of secant stiffness corresponding to Fig. 11. The detailed data is shown as below.

In the end, we look forward to hearing from you regarding our submission. We would be glad to respond to any further questions and comments that you may have.

Thank you for your evaluation!

Yours sincerely

Yaohong Wang
